# Supplementary material
Source: PubMed Central journal article supplement (PMC2000492)

A

µg of peptide

2 1 0.2

2 1 0.2

2 1 0.2

GST-NCESA1

GST-NCESA3

GST-NCESA6

Anti-NGST

Anti-NCESA3

Anti-NCESA6

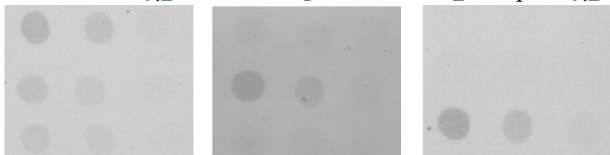

B

Immunoprecipitating antibody

Anti-NKOR  
Anti-NCESA6

KOR1

CESA6

Front of migration

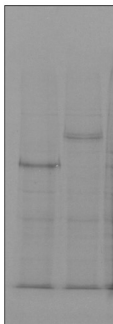

Supplement: pnas_0706569104_7.pdf [file pnas_0706569104_7.pdf]
