# Supplementary material
Source: PubMed Central journal article supplement (PMC2000492)

0 12 24 36 48 72 96 120 168 192 h

Anti-NCESA3

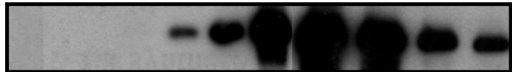

120 kDa

Anti-NCESA6

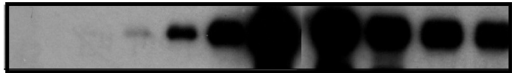

120 kDa

Supplement: pnas_0706569104_1.pdf [file pnas_0706569104_1.pdf]

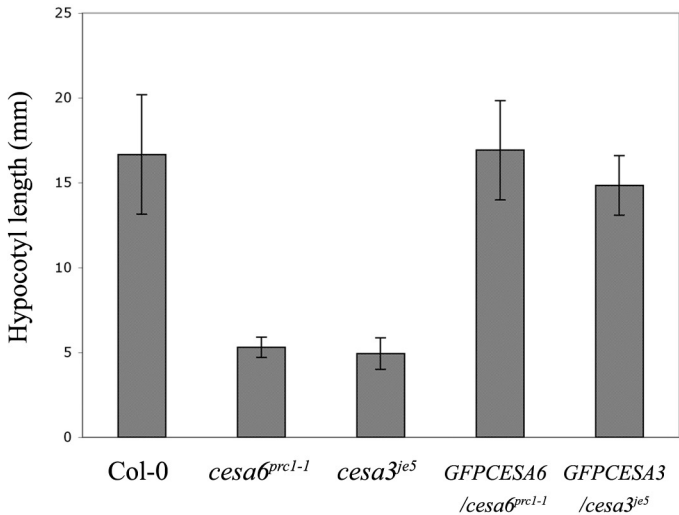

Supplement: pnas_0706569104_2.pdf [file pnas_0706569104_2.pdf]

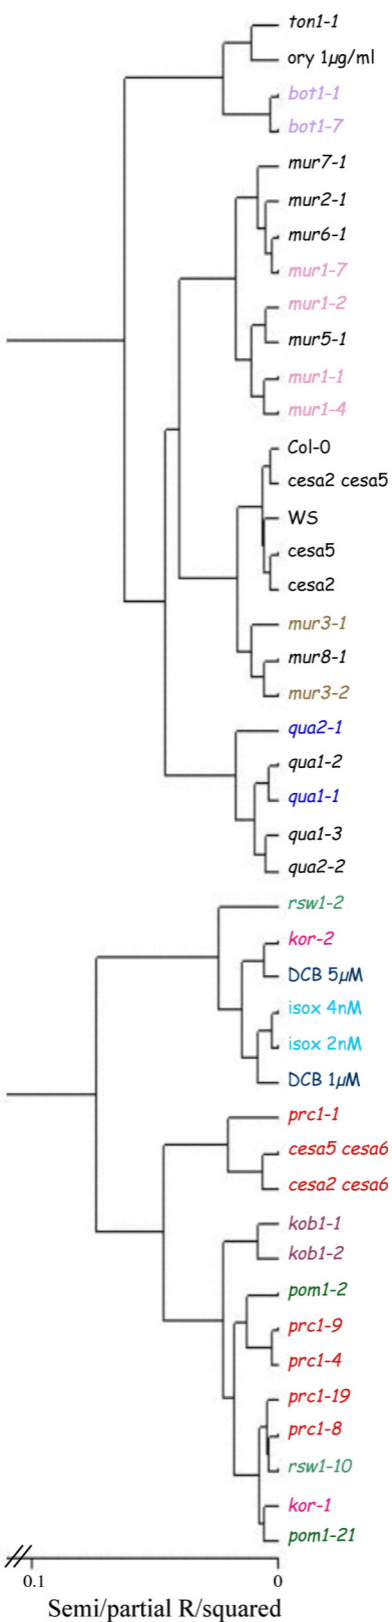

Supplement: pnas_0706569104_3.pdf [file pnas_0706569104_3.pdf]

A

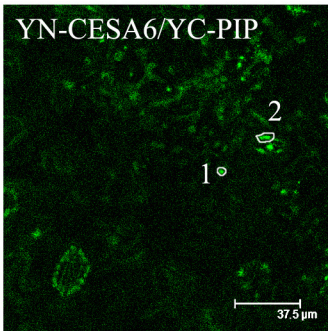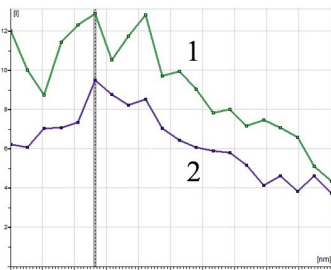

B

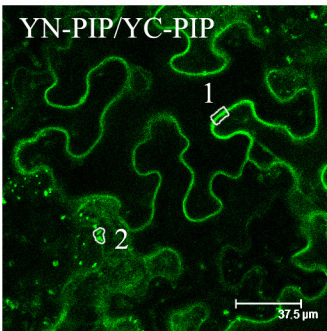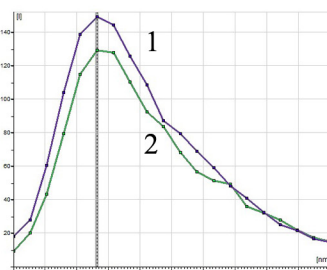

C

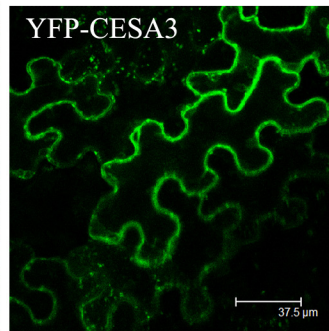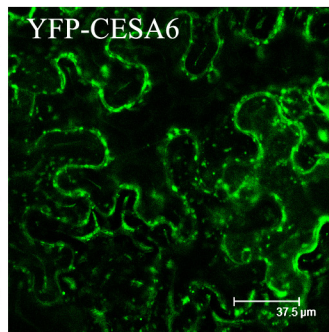

D

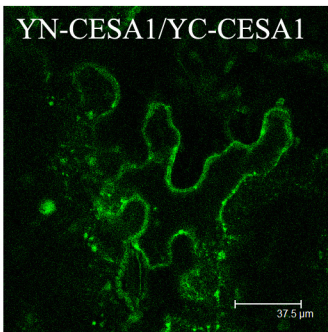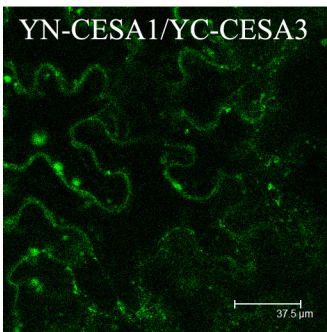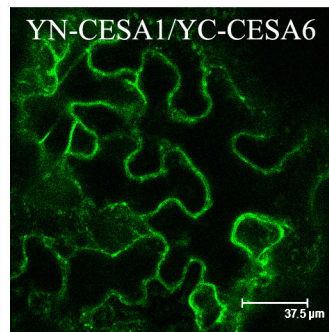

E

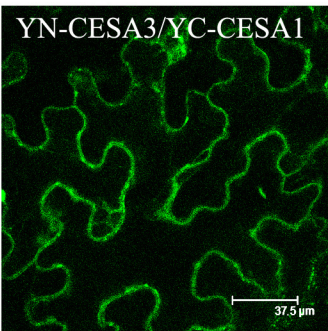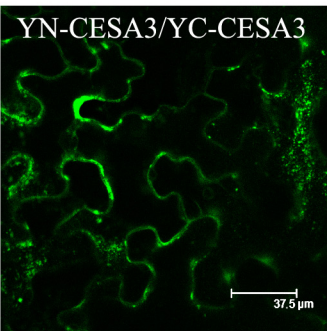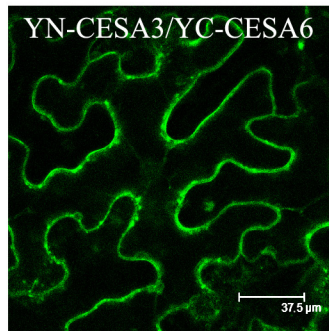

F

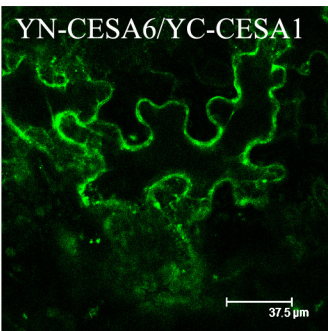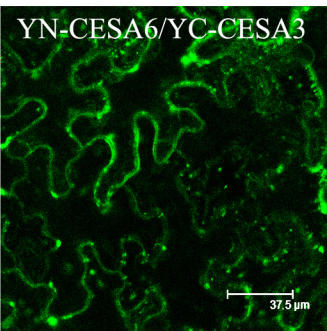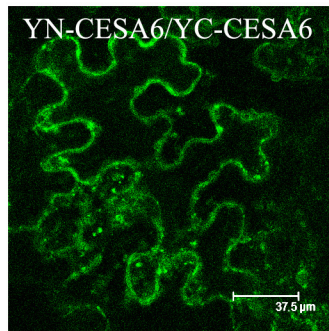

Supplement: pnas_0706569104_4.pdf [file pnas_0706569104_4.pdf]

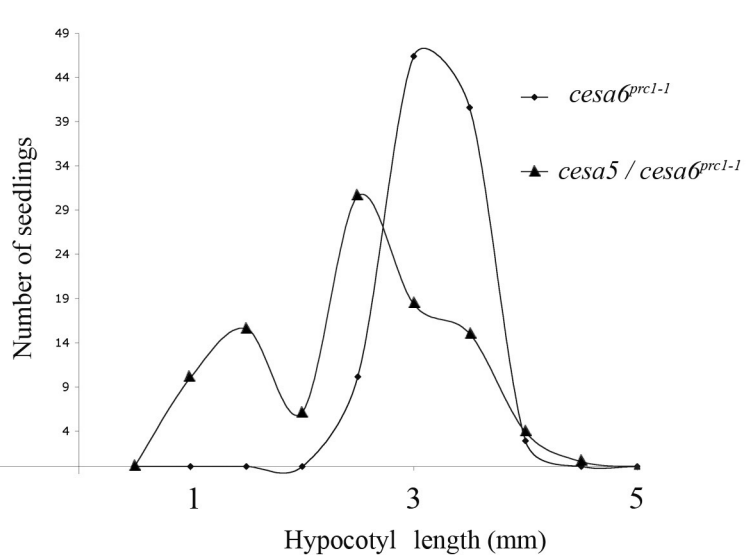

Supplement: pnas_0706569104_5.pdf [file pnas_0706569104_5.pdf]

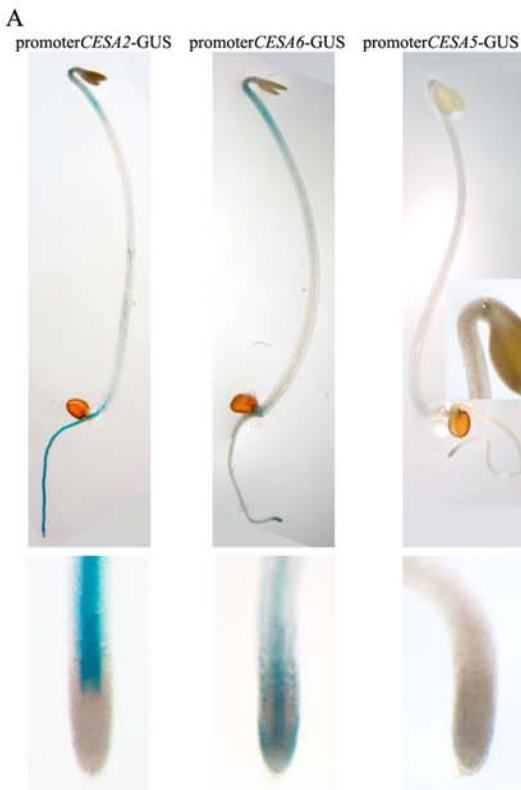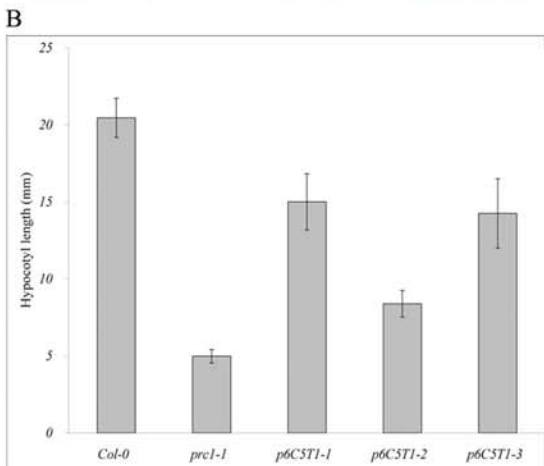

Supplement: pnas_0706569104_6.pdf [file pnas_0706569104_6.pdf]
